# Supplementary material
Source: MDPI journal article supplement (https://www.mdpi.com/2220-9964/10/12/810)
Supplement: s1 [file s1 › ijgi-1424979-SI.pdf]

# Supplementary Materials: Air Humidity Characteristics in “Local Climate Zones” of Novi Sad (Serbia) Based on Long-Term Data

Jelena Dunjić, Dragan Milošević, Milena Kojić, Stevan Savić, Zorana Lužanin, Ivan Šećerov and Daniela Arsenović

**Table S1.** Typical surface properties of 250 m radius environment around stations for each LCZ (obtained from Lelovics et al. 2016). Abbreviations refer to surface properties: HRE – height of roughness elements (m), SVF – sky view factor, BSF – building surface factor, ISF – impervious surface factor, PSF – pervious surface factor, ALB – albedo. NOTE: Low-level photo of representative location in each LCZ is given in the table. Aerial photos of representative stations are obtained from Google Earth Pro for 250 m radius environment around stations (yellow circle) (obtained from [47]).

| LCZ   | Number of stations | Surface properties | Low-level photo                                                                                     | Aerial photo (250 m radius)                                                                          |
|-------|--------------------|--------------------|-----------------------------------------------------------------------------------------------------|------------------------------------------------------------------------------------------------------|
| LCZ 2 | Two stations       | HRE 16.2 – 20.8    | Station 2-2<br>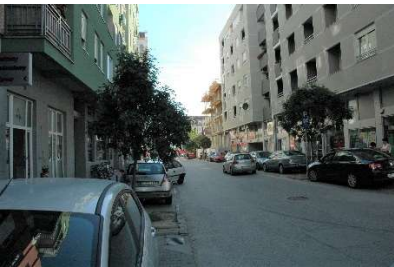  | Station 2-2<br>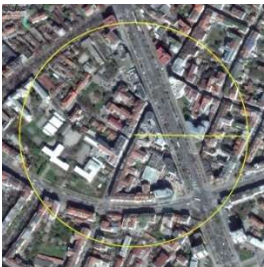  |
|       |                    | SVF 0.47 – 0.59    |                                                                                                     |                                                                                                      |
|       |                    | BSF 0.26 – 0.38    |                                                                                                     |                                                                                                      |
|       |                    | ISF 0.59 – 0.63    |                                                                                                     |                                                                                                      |
|       |                    | PSF 0.02 – 0.14    |                                                                                                     |                                                                                                      |
|       |                    | ALB 0.15 – 0.17    |                                                                                                     |                                                                                                      |
| LCZ 5 | Five stations      | HRE 15.9 – 25.7    | Station 5-6<br>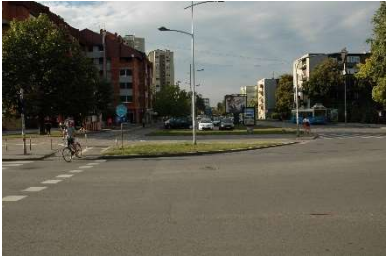 | Station 5-6<br>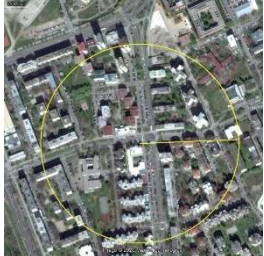 |
|       |                    | SVF 0.64 – 0.88    |                                                                                                     |                                                                                                      |
|       |                    | BSF 0.09 – 0.35    |                                                                                                     |                                                                                                      |
|       |                    | ISF 0.46 – 0.67    |                                                                                                     |                                                                                                      |
|       |                    | PSF 0.08 – 0.33    |                                                                                                     |                                                                                                      |
|       |                    | ALB 0.16 – 0.18    |                                                                                                     |                                                                                                      |
| LCZ 6 | Three stations     | HRE 12             | Station 6-4<br>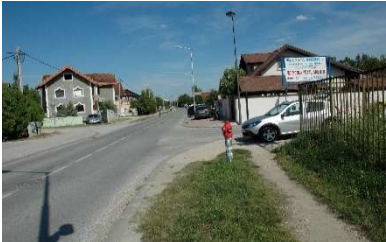 | Station 6-4<br>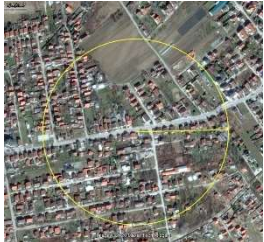 |
|       |                    | SVF 0.63 – 0.99    |                                                                                                     |                                                                                                      |
|       |                    | BSF 0.18 – 0.21    |                                                                                                     |                                                                                                      |
|       |                    | ISF 0.62 – 0.86    |                                                                                                     |                                                                                                      |
|       |                    | PSF 0.08 – 0.38    |                                                                                                     |                                                                                                      |
|       |                    | ALB 0.16 – 0.18    |                                                                                                     |                                                                                                      |
| LCZ 8 | One station        | HRE 12             | Station 8-1<br>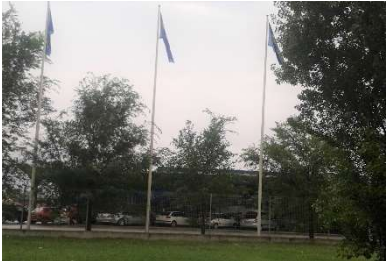 | Station 8-1<br>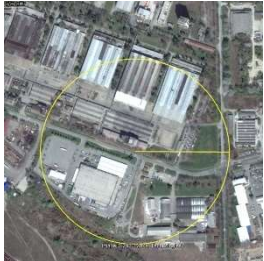 |
|       |                    | SVF 0.84           |                                                                                                     |                                                                                                      |
|       |                    | BSF 0.31           |                                                                                                     |                                                                                                      |
|       |                    | ISF 0.47           |                                                                                                     |                                                                                                      |
|       |                    | PSF 0.23           |                                                                                                     |                                                                                                      |
|       |                    | ALB 0.17           |                                                                                                     |                                                                                                      |
| LCZ 9 |                    | HRE 12             | Station 9-2<br>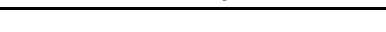 | Station 9-2<br>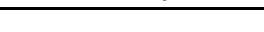 |

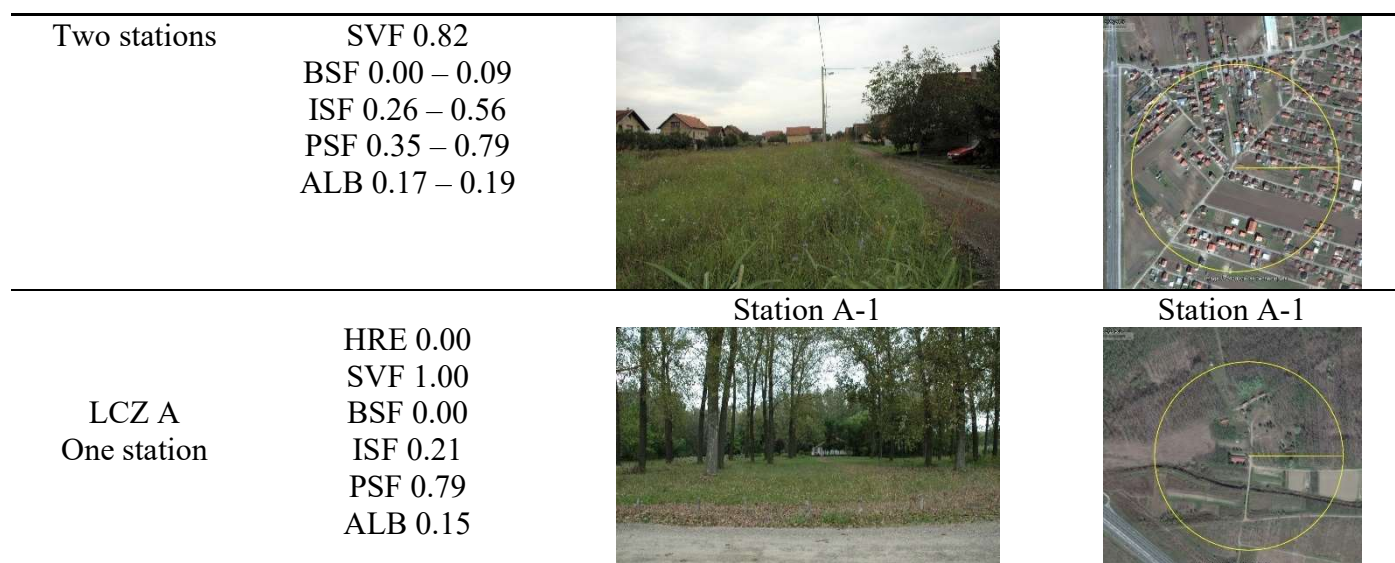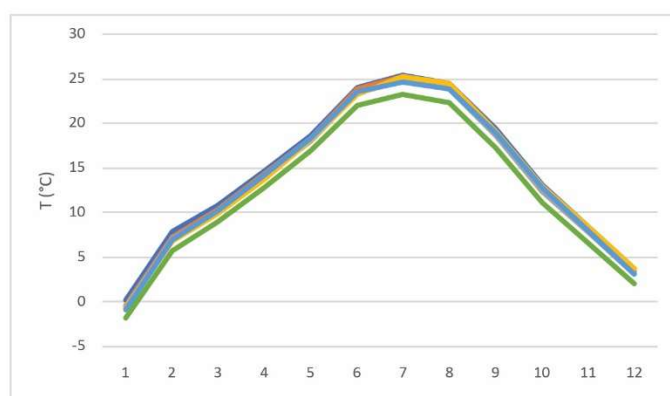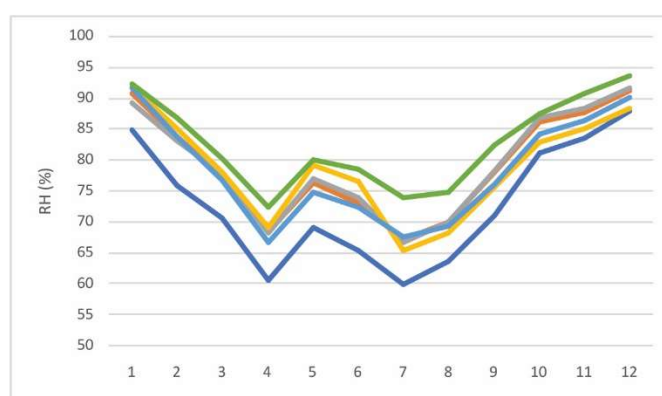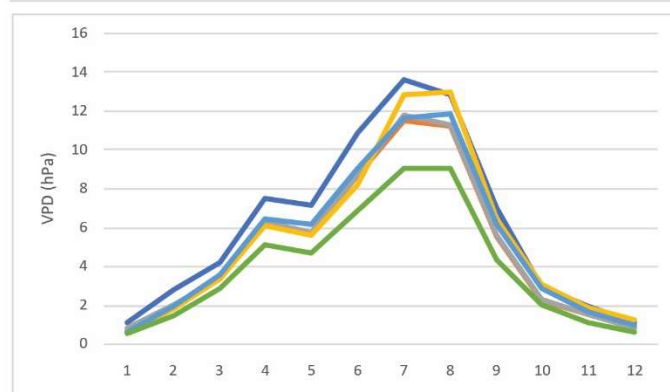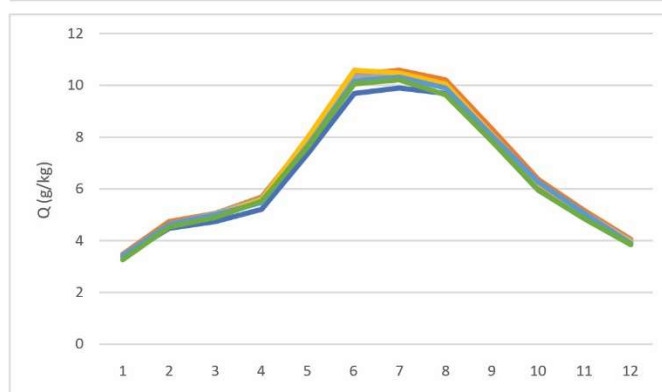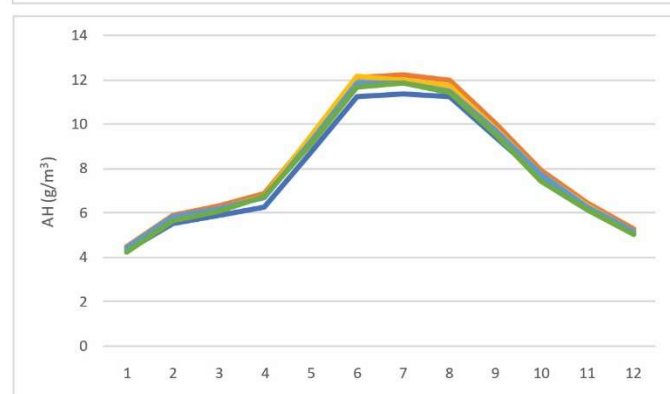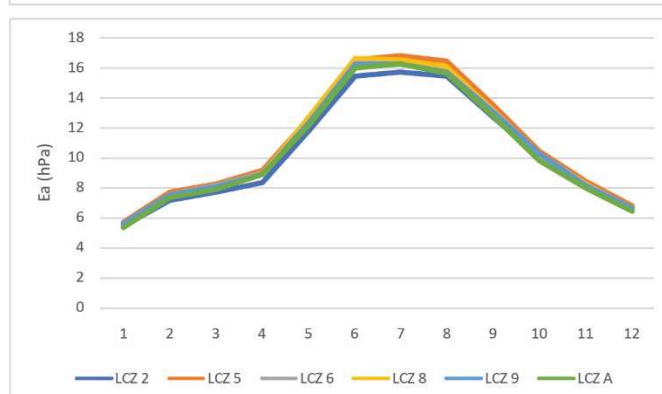

**Figure S1.** Monthly averages (Dec 2015–Dec 2017) of air temperature and humidity parameters (RH, VPD, Q, AH and Ea) in LCZs of Novi Sad.

| T LCZ X - LCZ A   | LCZ 2 | LCZ 5 | LCZ 6 | LCZ 8 | LCZ 9 | RH LCZ x - LCZ A | LCZ 2  | LCZ 5 | LCZ 6 | LCZ 8 | LCZ 9 |
|-------------------|-------|-------|-------|-------|-------|------------------|--------|-------|-------|-------|-------|
| January           | 1.96  | 1.38  | 1.19  | 1.03  | 0.93  | January          | -7.33  | -1.40 | -3.12 | -0.35 | -0.61 |
| February          | 1.99  | 1.51  | 1.31  | 0.94  | 1.19  | February         | -10.97 | -3.12 | -3.73 | -1.81 | -3.14 |
| March             | 1.76  | 1.40  | 1.11  | 0.98  | 1.23  | March            | -9.75  | -2.83 | -2.45 | -2.24 | -3.65 |
| April             | 1.78  | 1.39  | 1.18  | 0.96  | 1.30  | April            | -11.91 | -4.04 | -4.22 | -3.27 | -5.74 |
| May               | 1.59  | 1.31  | 1.09  | 1.16  | 1.30  | May              | -10.96 | -3.64 | -3.03 | -0.72 | -5.22 |
| June              | 1.89  | 1.67  | 1.33  | 1.23  | 1.48  | June             | -12.97 | -5.36 | -4.59 | -1.85 | -6.06 |
| July              | 2.05  | 1.90  | 1.49  | 2.02  | 1.36  | July             | -13.92 | -6.66 | -7.11 | -8.37 | -6.24 |
| August            | 2.07  | 1.97  | 1.52  | 2.15  | 1.55  | August           | -11.26 | -4.91 | -4.94 | -6.61 | -5.45 |
| September         | 2.12  | 1.89  | 1.39  | 1.98  | 1.70  | September        | -11.45 | -4.42 | -4.10 | -6.74 | -6.31 |
| October           | 1.81  | 1.57  | 1.07  | 1.84  | 1.66  | October          | -6.36  | -1.23 | -0.67 | -4.61 | -3.21 |
| November          | 1.87  | 1.71  | 1.22  | 1.89  | 1.40  | November         | -7.11  | -3.07 | -2.25 | -5.60 | -4.35 |
| December          | 1.70  | 1.37  | 0.97  | 1.59  | 1.07  | December         | -5.67  | -2.37 | -1.88 | -5.35 | -3.45 |
| VPD LCZ x - LCZ A | LCZ 2 | LCZ 5 | LCZ 6 | LCZ 8 | LCZ 9 | Ea LCZ x - LCZ A | LCZ 2  | LCZ 5 | LCZ 6 | LCZ 8 | LCZ 9 |
| January           | 0.57  | 0.15  | 0.27  | 0.07  | 0.09  | January          | 0.10   | 0.32  | 0.14  | 0.27  | 0.23  |
| February          | 1.32  | 0.46  | 0.53  | 0.32  | 0.45  | February         | -0.17  | 0.34  | 0.20  | 0.19  | 0.19  |
| March             | 1.37  | 0.49  | 0.44  | 0.47  | 0.67  | March            | -0.20  | 0.33  | 0.23  | 0.17  | 0.17  |
| April             | 2.43  | 1.05  | 1.18  | 1.03  | 1.37  | April            | -0.57  | 0.21  | 0.03  | 0.01  | -0.05 |
| May               | 2.51  | 0.96  | 1.00  | 0.93  | 1.47  | May              | -0.45  | 0.41  | 0.27  | 0.50  | 0.14  |
| June              | 3.99  | 1.81  | 1.81  | 1.32  | 2.22  | June             | -0.53  | 0.61  | 0.34  | 0.67  | 0.26  |
| July              | 4.57  | 2.44  | 2.71  | 3.83  | 2.58  | July             | -0.57  | 0.60  | 0.04  | 0.27  | 0.00  |
| August            | 3.79  | 2.11  | 2.23  | 3.95  | 2.81  | August           | -0.14  | 0.86  | 0.37  | 0.54  | 0.14  |
| September         | 2.65  | 1.14  | 1.22  | 2.08  | 1.81  | September        | -0.10  | 0.75  | 0.37  | 0.43  | 0.30  |
| October           | 0.99  | 0.27  | 0.25  | 1.08  | 0.88  | October          | 0.28   | 0.71  | 0.47  | 0.45  | 0.48  |
| November          | 0.88  | 0.44  | 0.38  | 0.80  | 0.64  | November         | 0.15   | 0.47  | 0.29  | 0.29  | 0.22  |
| December          | 0.53  | 0.27  | 0.21  | 0.64  | 0.41  | December         | 0.15   | 0.29  | 0.18  | 0.12  | 0.12  |
| AH LCZ x - LCZ A  | LCZ 2 | LCZ 5 | LCZ 6 | LCZ 8 | LCZ 9 | Q LCZ x - LCZ A  | LCZ 2  | LCZ 5 | LCZ 6 | LCZ 8 | LCZ 9 |
| January           | 0.05  | 0.23  | 0.09  | 0.20  | 0.16  | January          | 0.07   | 0.21  | 0.08  | 0.16  | 0.14  |
| February          | -0.17 | 0.23  | 0.13  | 0.13  | 0.12  | February         | -0.09  | 0.23  | 0.12  | 0.12  | 0.13  |
| March             | -0.19 | 0.23  | 0.15  | 0.11  | 0.11  | March            | -0.16  | 0.19  | 0.13  | 0.09  | 0.07  |
| April             | -0.46 | 0.13  | 0.00  | -0.01 | -0.07 | April            | -0.34  | 0.14  | 0.10  | 0.02  | -0.05 |
| May               | -0.38 | 0.26  | 0.17  | 0.34  | 0.06  | May              | -0.32  | 0.22  | 0.16  | 0.34  | 0.02  |
| June              | -0.45 | 0.39  | 0.20  | 0.45  | 0.14  | June             | -0.39  | 0.38  | 0.27  | 0.49  | 0.11  |
| July              | -0.49 | 0.36  | -0.02 | 0.12  | -0.05 | July             | -0.36  | 0.35  | 0.05  | 0.20  | 0.08  |
| August            | -0.17 | 0.55  | 0.22  | 0.32  | 0.06  | August           | -0.01  | 0.57  | 0.30  | 0.35  | 0.21  |
| September         | -0.13 | 0.50  | 0.24  | 0.26  | 0.17  | September        | -0.02  | 0.48  | 0.24  | 0.25  | 0.17  |
| October           | 0.17  | 0.50  | 0.33  | 0.30  | 0.32  | October          | 0.19   | 0.43  | 0.26  | 0.27  | 0.31  |
| November          | 0.08  | 0.33  | 0.20  | 0.19  | 0.14  | November         | 0.13   | 0.31  | 0.19  | 0.20  | 0.16  |
| December          | 0.09  | 0.20  | 0.12  | 0.06  | 0.07  | December         | 0.10   | 0.18  | 0.10  | 0.07  | 0.04  |

**Figure S2.** Monthly mean differences in air temperature and humidity parameters (RH, VPD, Ea, AH and Q) between urban LCZs (2, 5, 6, 8, and 9) and rural LCZ A (positive difference—blue, negative difference—red).

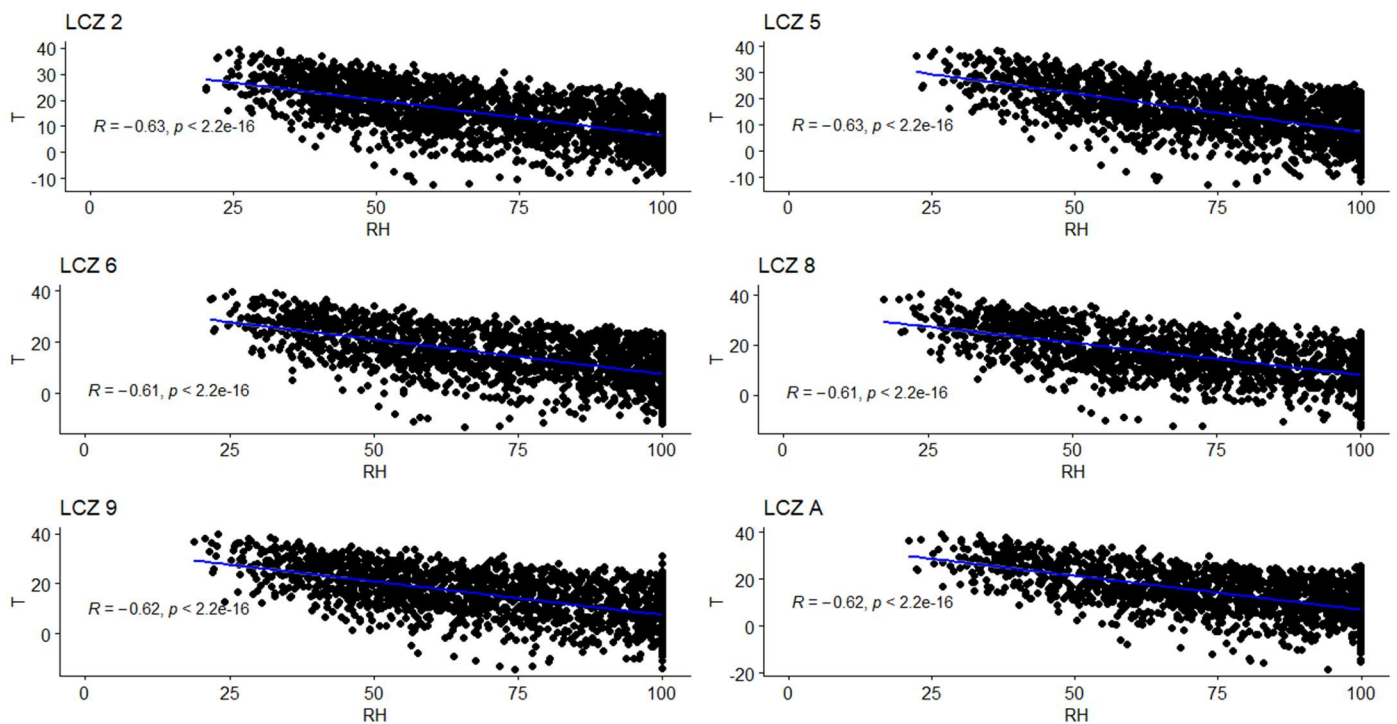

**Figure S3.** Relationship between air temperature  $T$  (°C) and relative humidity  $RH$  (%), in LCZ 2 and LCZ A during the two-year period in Novi Sad.

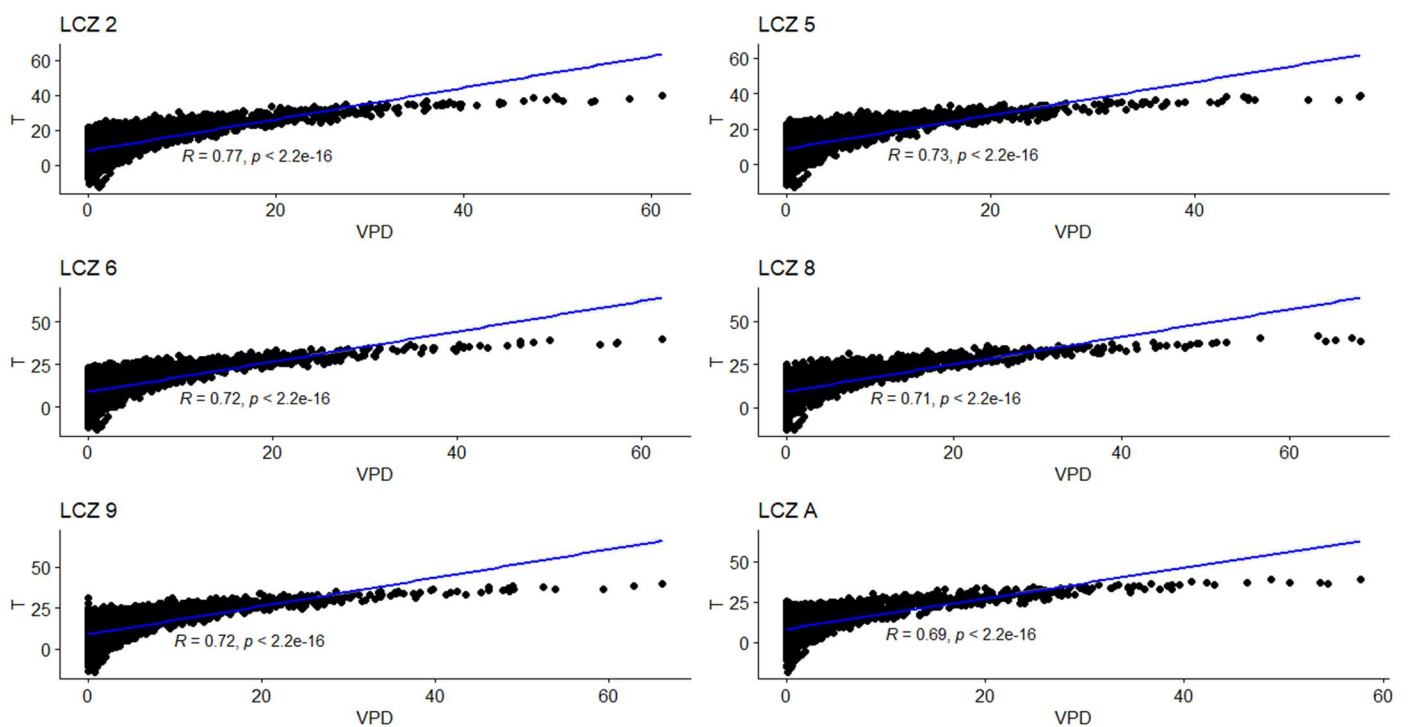

**Figure S4.** Relationship between air temperature  $T$  (°C) and vapor pressure deficit  $VPD$  (hPa) in LCZ 2 and LCZ A during the two-year period in Novi Sad.

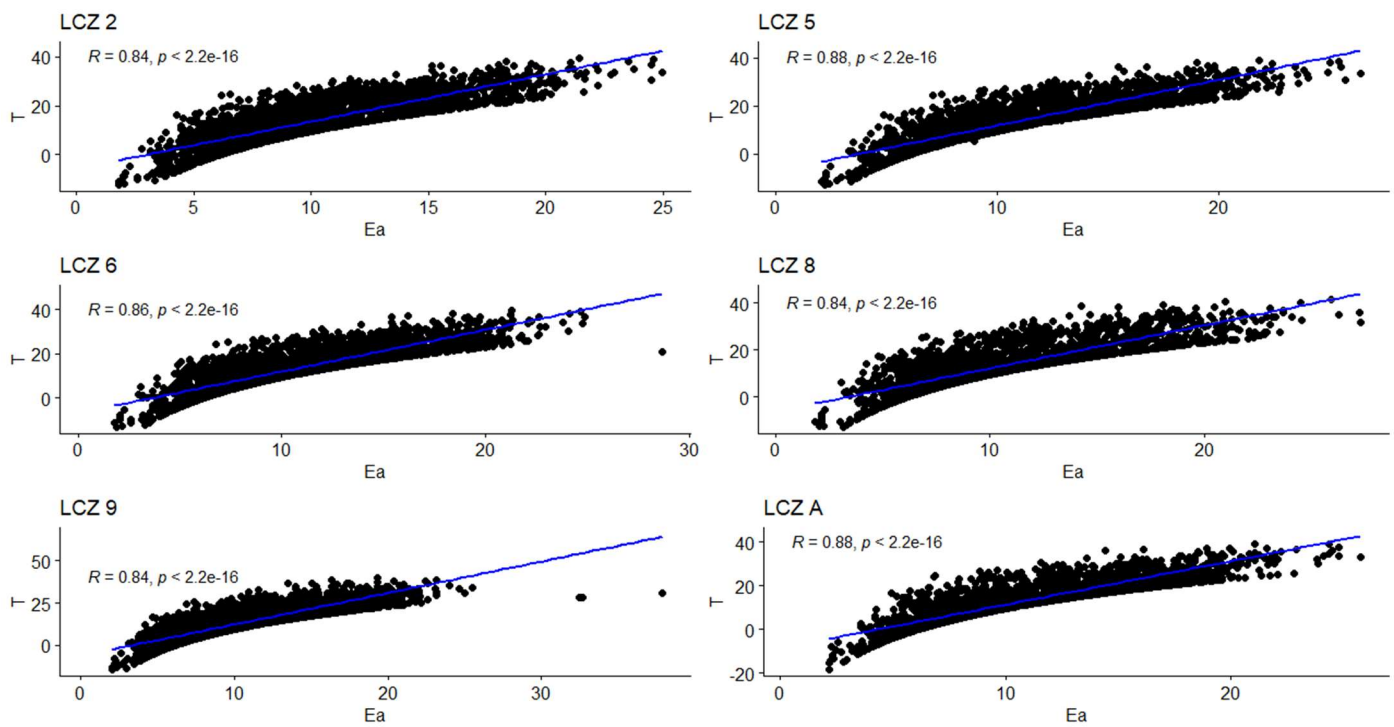

**Figure S5.** Relationship between air temperature  $T$  (°C) and atmospheric water vapor pressure  $Ea$  (hPa) in LCZ 2 and LCZ A during the two-year period in Novi Sad.

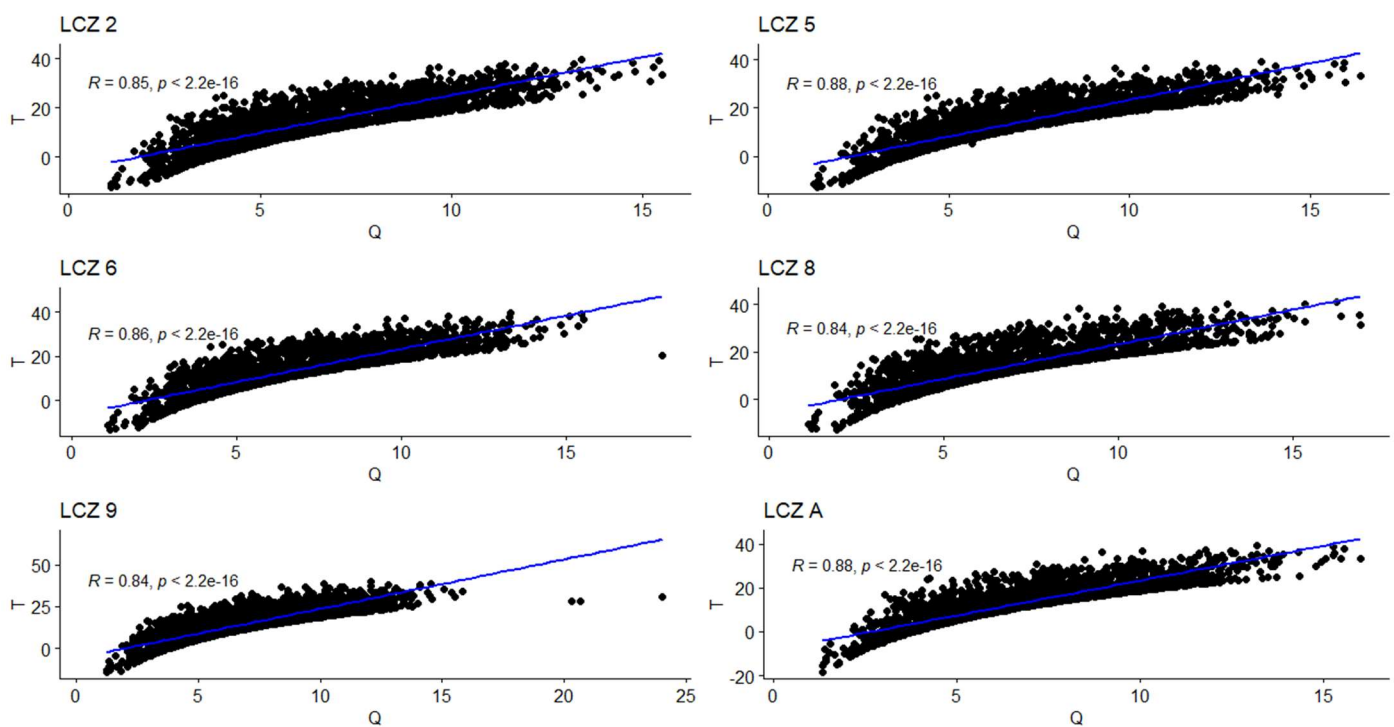

**Figure S6.** Relationship between air temperature  $T$  (°C) and specific humidity  $Q$  (g/kg) in LCZ 2 and LCZ A during the two-year period in Novi Sad. .
